# Supplementary material for: Questionnaire-based survey on the distribution and incidence of canine babesiosis in countries of Western Europe
Source: PubMed Central journal article supplement (PMC3952654; doi:10.1051/parasite/2014015), 2014-03-14
Supplement: parasite-21-13-s1.pdf [file parasite-21-13-s1.pdf]

## Questionnaire Canine Babesiose Western Europe

1) Date \_\_\_\_\_

2) Address of the clinic

---

---

2) Number of veterinarians working in the clinic

---

3)

|                                                                                      |  |
|--------------------------------------------------------------------------------------|--|
| <b>Number of cases of canine babesiosis diagnosed in the clinic last year (2010)</b> |  |
|--------------------------------------------------------------------------------------|--|

|  |
|--|
|  |
|--|

4) Additional remarks

|  |
|--|
|  |
|--|
